# Supplementary material for: One-pot synthesis of M (M = Ag, Au)@SiO2 yolk–shell structures via an organosilane-assisted method: preparation, formation mechanism and application in heterogeneous catalysis
Source: Royal Society of Chemistry journal article supplement (doi:10.1039/c5dt00925a), 2015-01-01
Supplement: c5dt00925a1.pdf [file c5dt00925a1.pdf]

# One-Pot Synthesis of M ( M= Ag, Au )@SiO<sub>2</sub> Yolk-Shell Structure via Organosilane-Assisted Method: Preparation, Formation Mechanism and Application in Heterogeneous Catalysis

Yu Chen,<sup>a,b</sup> Qihua Wang<sup>\*a</sup> Tingmei Wang,<sup>a</sup>

<sup>a</sup> State Key Laboratory of Solid Lubrication, Lanzhou Institute of Chemical Physics, Chinese Academy of Sciences, Lanzhou, 730000, P. R. China.

<sup>b</sup> University of Chinese Academy of Sciences, Beijing, 100039, P. R. China.

\*E-mail: wangqh@licp.cas.cn.

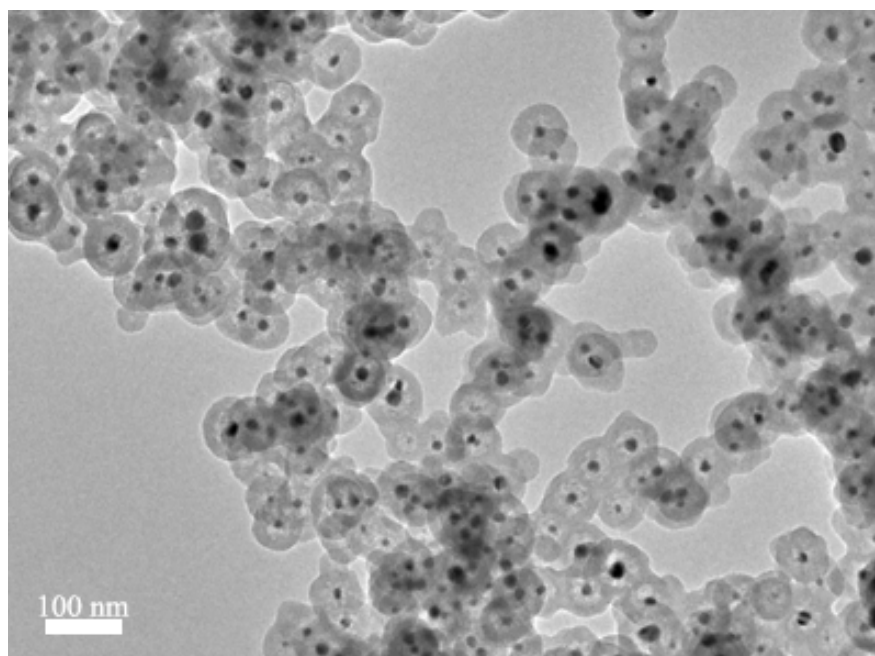

Figure S1. TEM image of Ag@SiO<sub>2</sub> nanorattles when replacing APTMS with APTES.

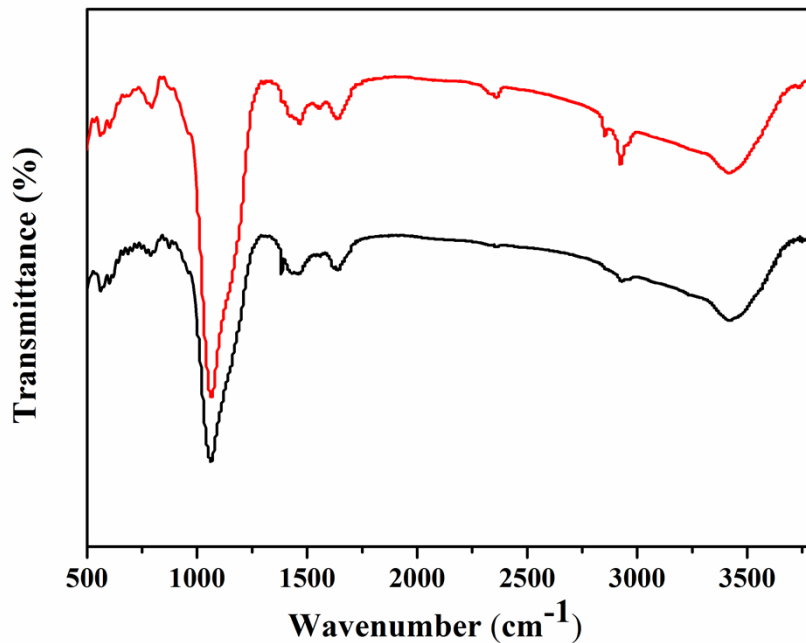

Figure S2. The FT-IR spectra of (a) as-made yolk-shell Ag@CTAB/SiO<sub>2</sub> without the treatment of ethanol/ammonium nitrate and Ag@mSiO<sub>2</sub> microspheres after the mild treatment of ethanol/ammonium nitrate. For the Ag@CTAB/SiO<sub>2</sub>, the bands observed in the region 2800-3000 cm<sup>-1</sup> are attributed to the vibrations of -CH<sub>2</sub> of CTAB templates. After removing CTAB, almost no adsorption peaks were observed in the range of 2800-3000 cm<sup>-1</sup> for the Ag@mSiO<sub>2</sub>.

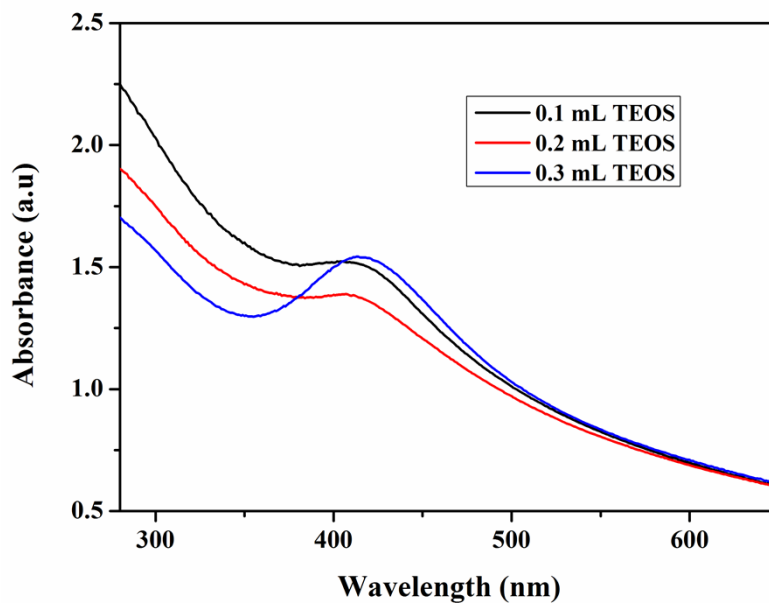

Figure S3. The optical properties of Ag@SiO<sub>2</sub> fabricated with different amount of F-TEOS.

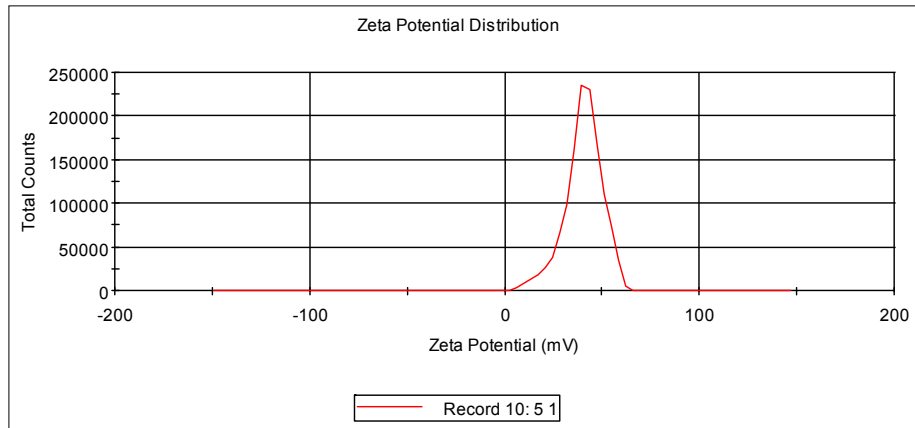

Figure S4. The as-synthesized nanorattles show a positive  $\zeta$  potential.

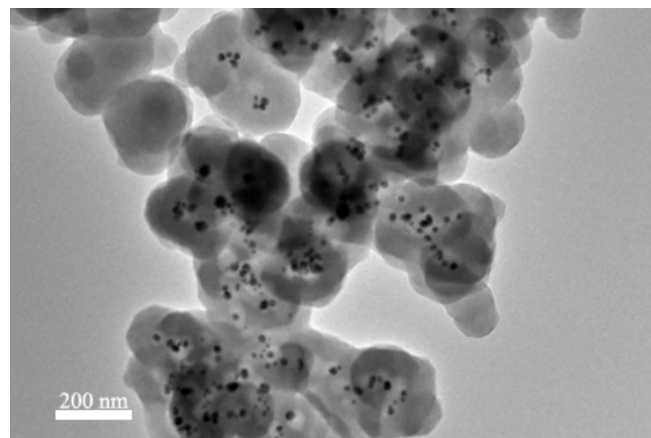

Figure S5. TEM image of the morphology of the as-synthesized nanocomposites when extending the gel time of F-TEOS to 12 hour.

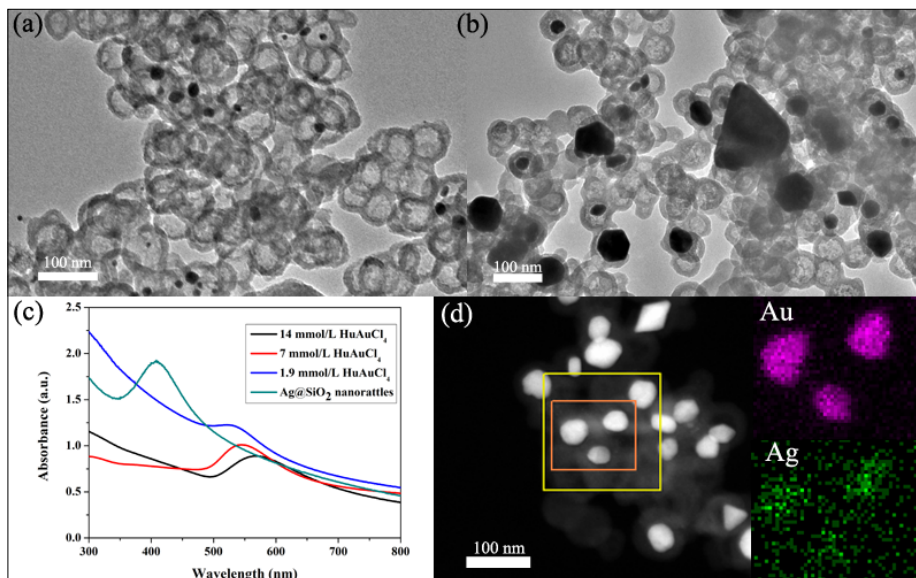

Figure S6. TEM image of Ag@SiO<sub>2</sub> nanorattles obtained by impregnating the as-synthesized Ag@SiO<sub>2</sub> nanorattles in different concentration of HAuCl<sub>4</sub> aqueous solution. (a) 1.9 mM, (b) 14 Mm and their corresponding UV-vis absorbance. (d) EDS elemental mapping of the as-made Au nanoparticles.
